# Supplementary material for: Ligand recognition and biased agonism of the D1 dopamine receptor
Source: PubMed Central journal article supplement (PMC9177848; doi:10.1038/s41467-022-30929-w), 2022-06-08
Supplement: 41467_2022_30929_MOESM1_ESM.pdf [file 41467_2022_30929_MOESM1_ESM.pdf]

**SUPPLEMENTARY INFORMATION**

D1R-mini-G $\alpha_s$ -G $\beta$ -G $\gamma$   
T4L-D1R-G $\alpha_s$ -G $\beta$ -G $\gamma$

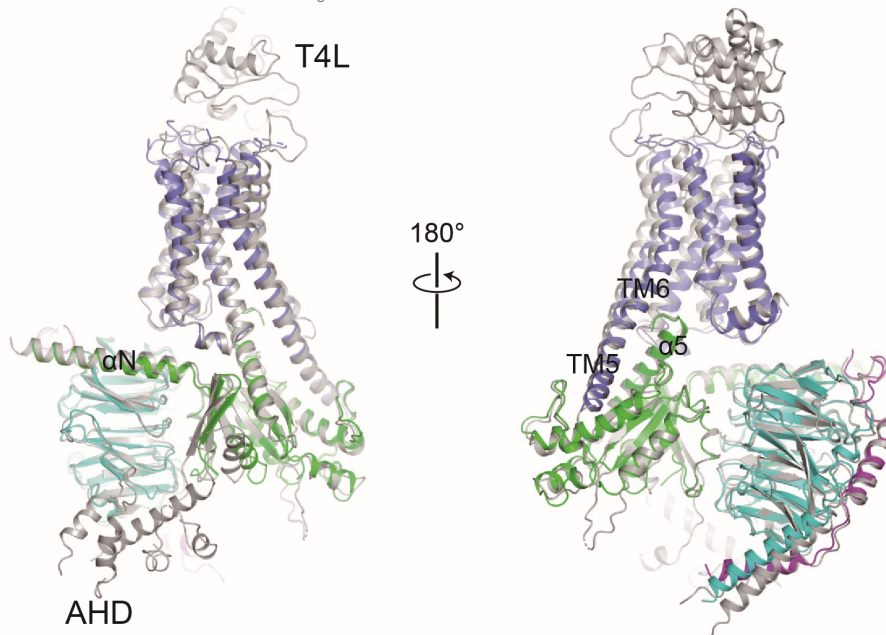

**Supplementary Fig. 1.** Structural overlay of the cryo-EM structure of D1R-minGs complex and the crystal structure of this complex (PDB ID: 7JOZ) in two opposite views.

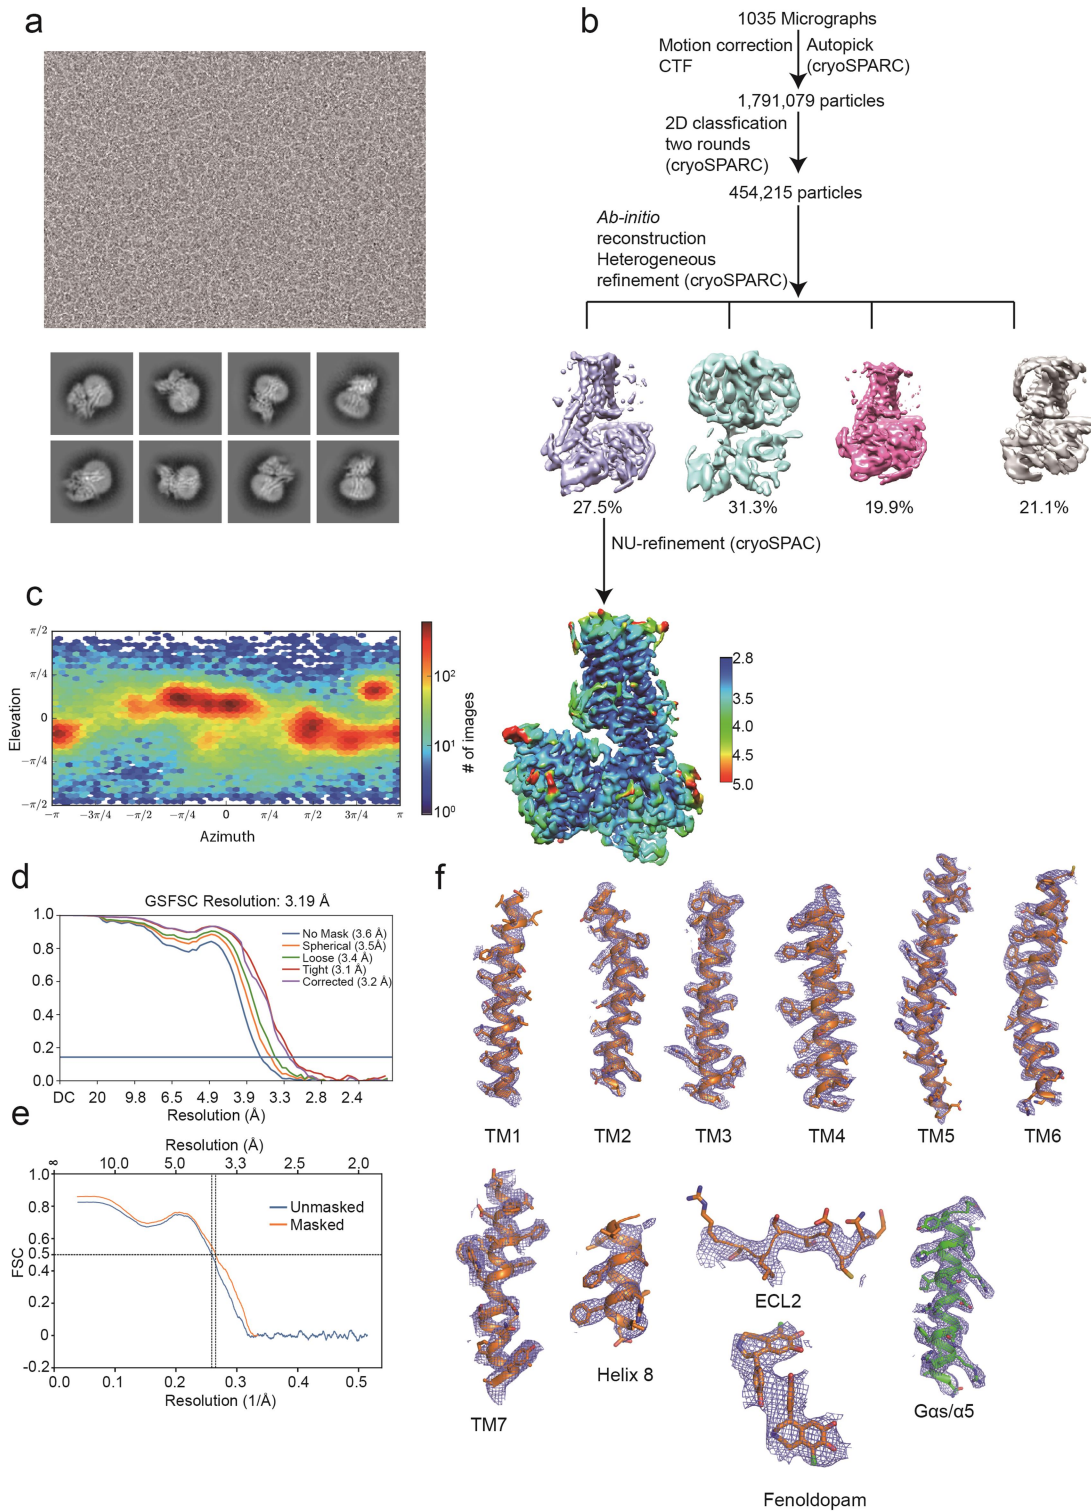

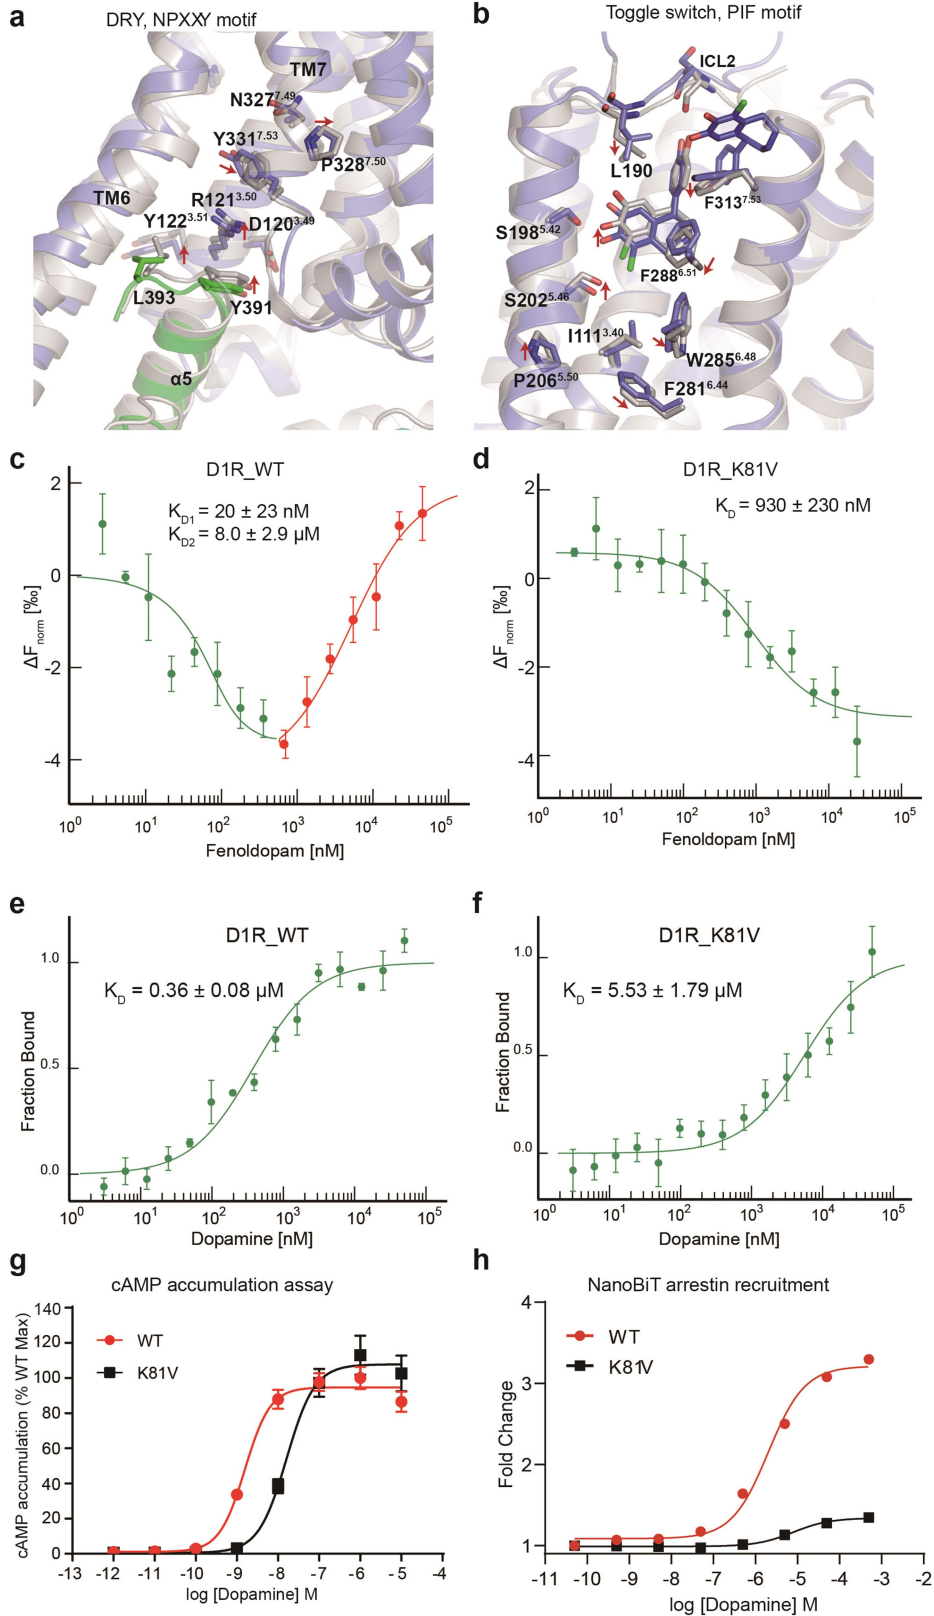

**Supplementary Fig. 3. Structural comparison of the fenoldopam-bound D1R complex in this study with that in the previous study. a,** Conformation changes of D<sup>3.49</sup>R<sup>3.50</sup>Y<sup>3.51</sup> and N<sup>7.49</sup>P<sup>7.50</sup>xxY<sup>7.53</sup> motif. **b,** Conformational changes of ligand binding pocket and the P<sup>5.50</sup>I<sup>3.40</sup>F<sup>6.44</sup> motif. **c,** MST binding experiment in which fenoldopam was titrated to the fluorescence-labeled D1R-mini-Gas WT. The MST curve indicates a biphasic event. The high affinity (green) and low affinity phase (red) are independently fit to yield two dissociation constants, K<sub>D1</sub> and K<sub>D2</sub>. **d,** MST binding curve of the D1R-mini-Gas K81V mutant titrated with fenoldopam reveals a single binding event. **e-f,** MST binding curve of D1R-mini-Gas WT (**e**) and K81V mutant (**f**) titrated with dopamine. All MST binding curves are repeated in three independent times. Each data point are presented as mean values +/- SD. **g-h,** Concentration-response curve for D1R WT and the K81V mutant activated by dopamine measured using the cAMP accumulation assay (**g**) and NanoBiT β-arrestin recruitment assay (**h**). All data represent mean ± S.E.M from three independent experiments. The cAMP accumulation assay was performed in Expi293F cells transiently expressing the cAMP GloSensor. Response in the cAMP assay is expressed as percentage of maximal response of WT. Source data are provided as a Source Data file.

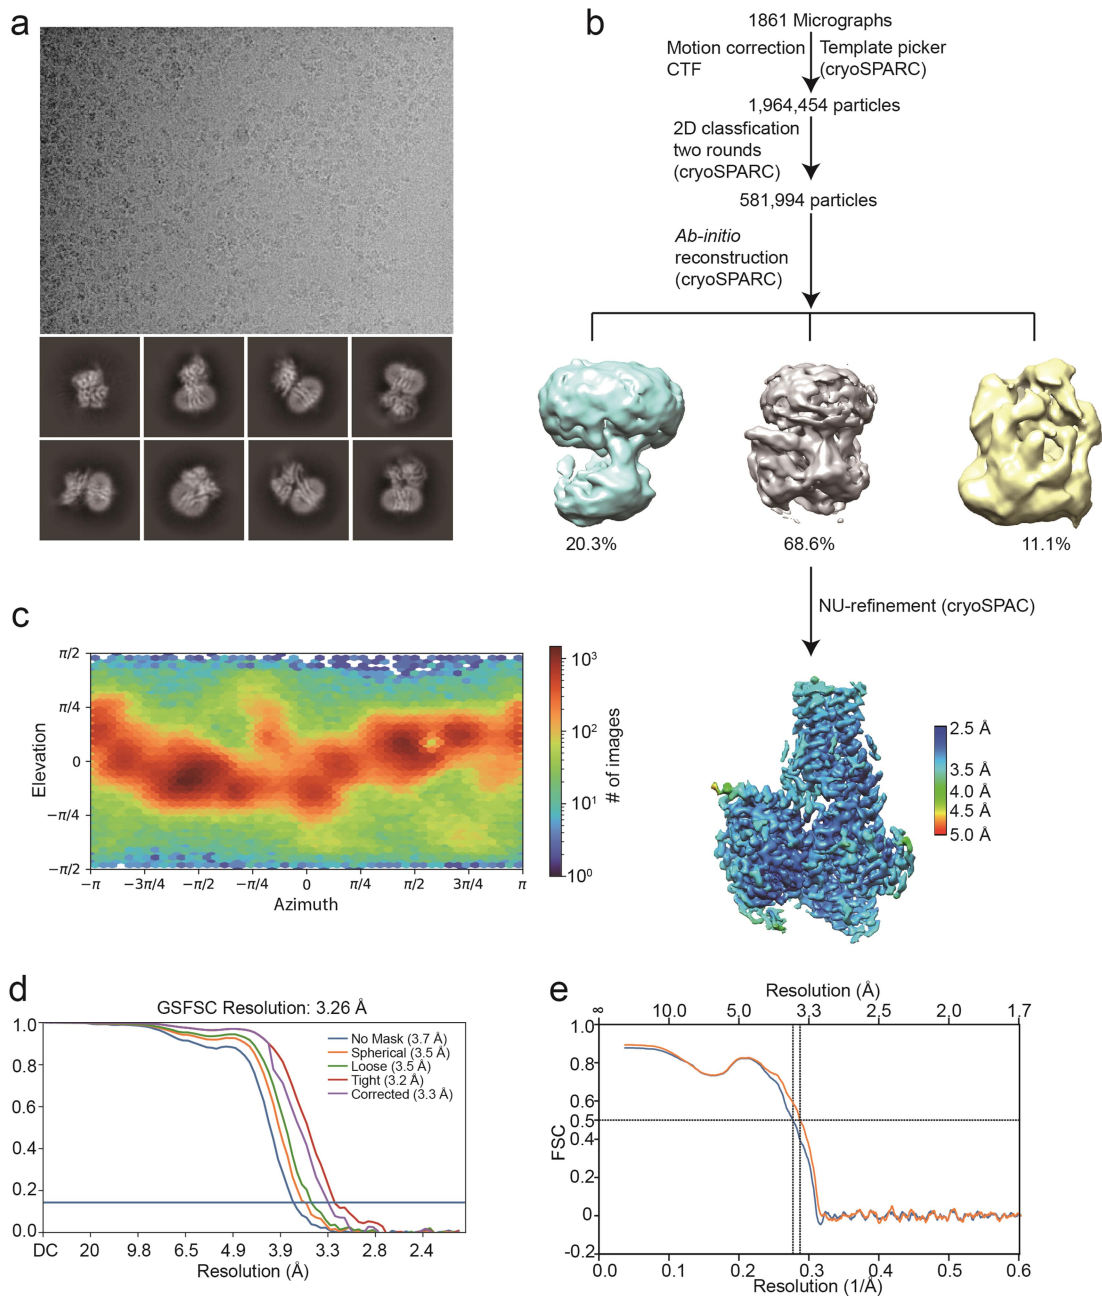

**Supplementary Fig. 4. Cryo-EM data processing for the tavapadon-bound D1R complex. a,** Representative cryo-EM image (top) and 2D class average (bottom). **b,** Cryo-EM workflow chart. **c,** Angular distribution plot. **d,** Gold standard FSC curves. **e,** FSC curves of model-to-map.

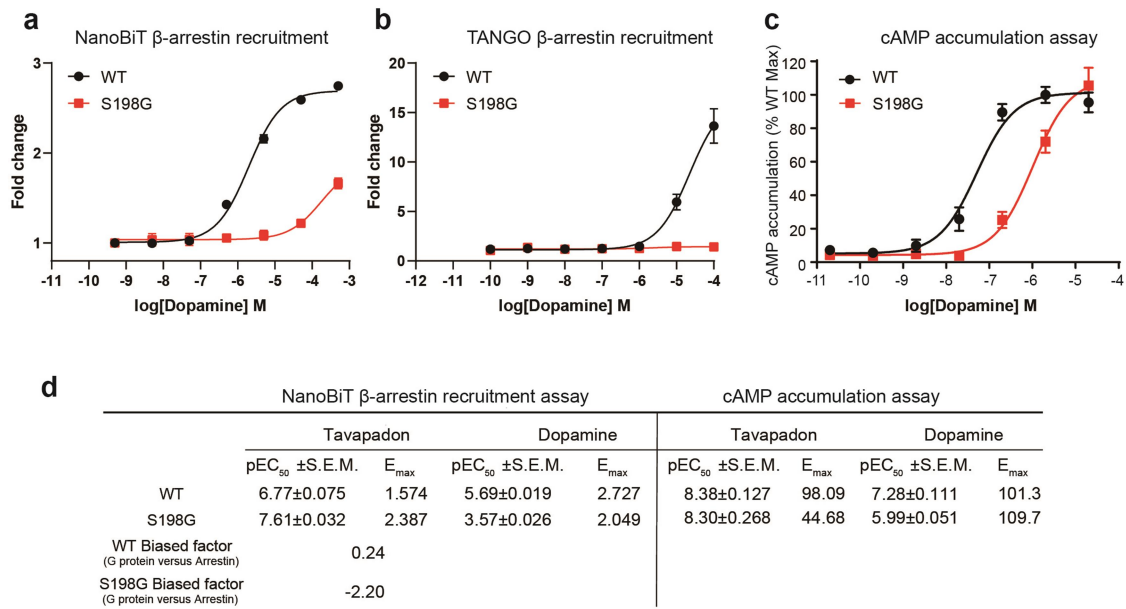

**Supplementary Fig. 5. Tavapadon is a more potent  $\beta$ -arrestin-biased agonist for D1R S198G compared to WT.** **a-c**, Concentration response curves for D1R WT and S198G mutant using NanoBiT (**a**) and TANGO (**b**)  $\beta$ -arrestin recruitment assays, and cAMP accumulation assay (**c**). All data represent mean  $\pm$  S.E.M from three independent experiments. **d**, Summary of the maximum response (E<sub>max</sub>) and pEC<sub>50</sub> from the NanoBiT  $\beta$ -arrestin recruitment assay and the cAMP accumulation assay for tavapadon and dopamine. Bias factors for tavapadon were calculated using dopamine as a reference ligand. Source data are provided as a Source Date file.

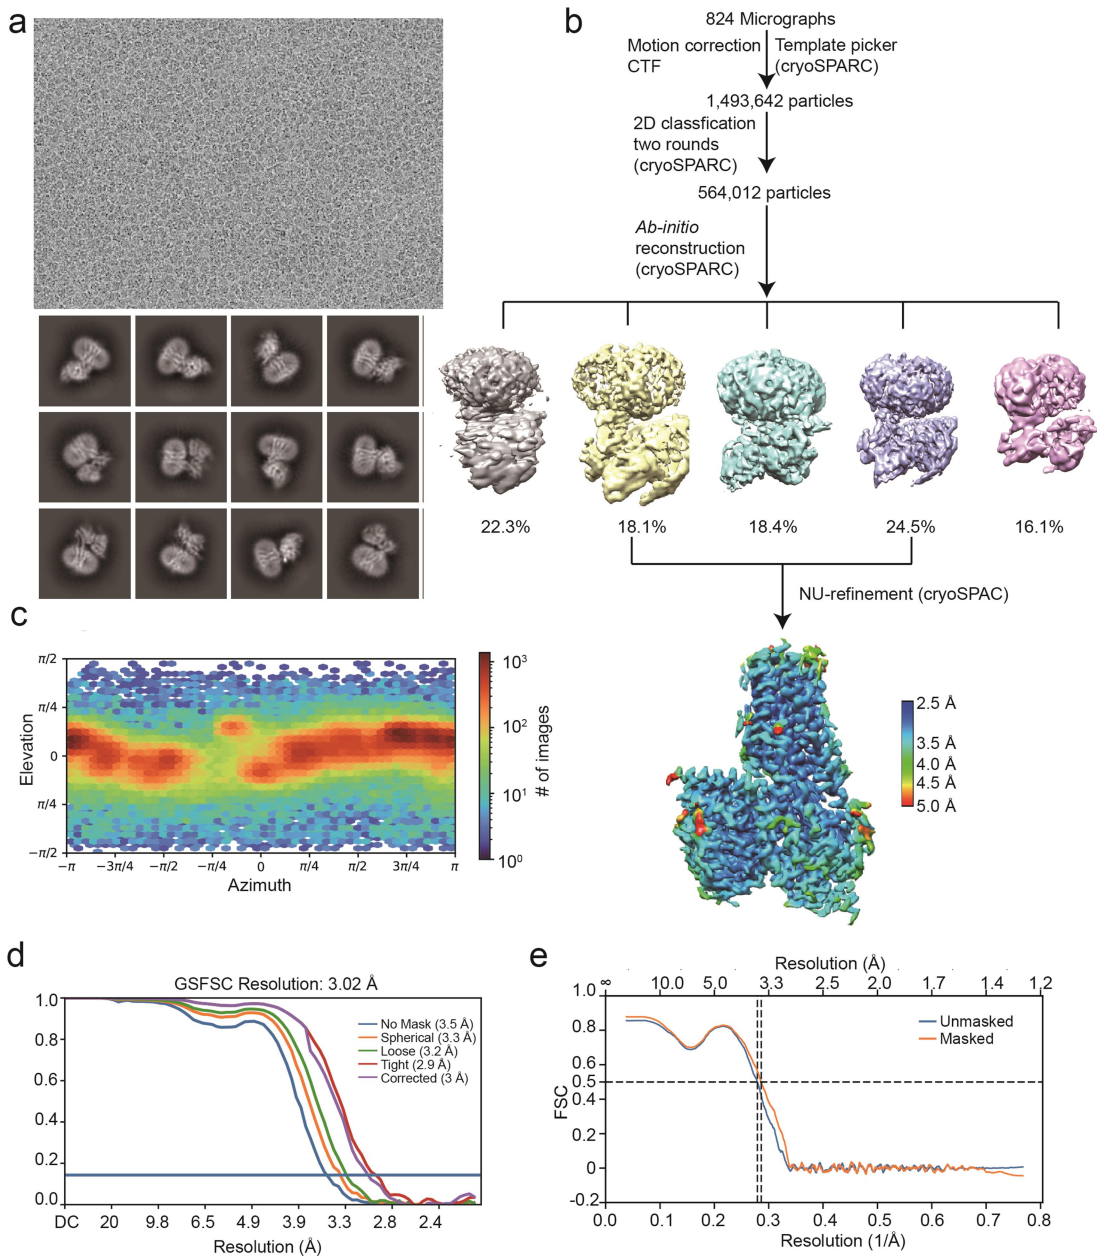

**Supplementary Fig. 6. Cryo-EM data processing for the D1R complex simultaneously bound to dopamine and LY3154207. a,** Representative cryo-EM image (top) and 2D class average (bottom). **b,** Cryo-EM workflow chart. **c,** Angular distribution plot. **d,** Gold standard FSC curves. **e,** FSC curves of model-to-map.

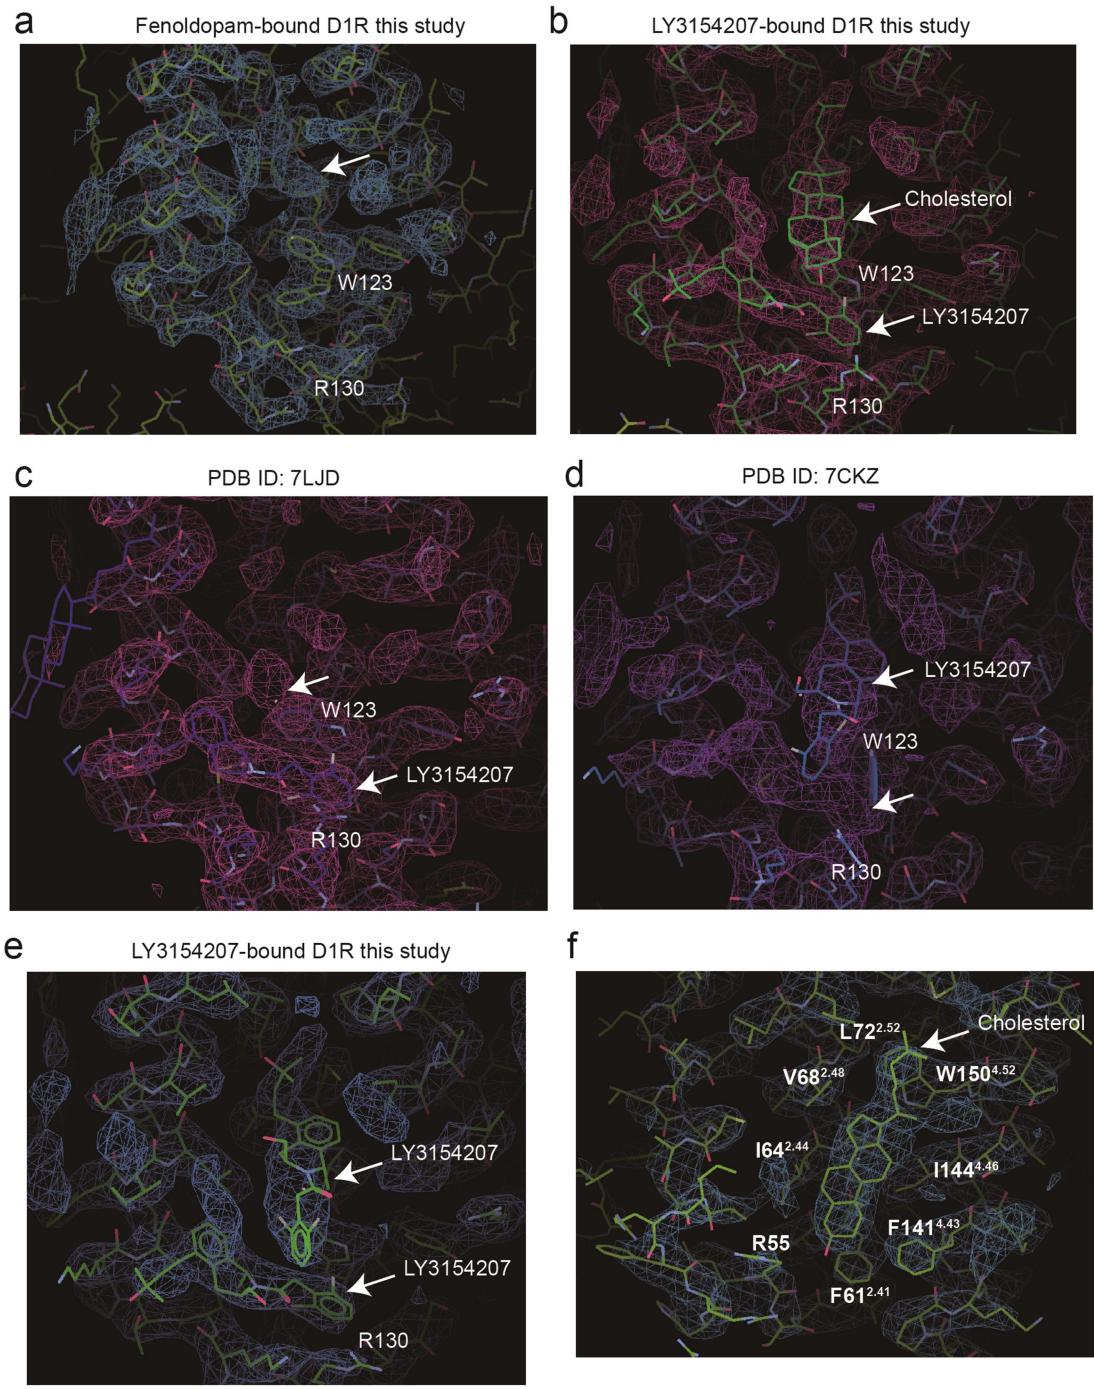

**Supplementary Fig. 7. Representative EM density map.** **a**, EM density for the region of the fenoldopam-bound D1R complex corresponding to the LY3154207 binding site in the structure of the LY3154207-bound D1R complex from this study. The arrow indicates the partially resolved density of cholesterol. **b**, Cholesterol and LY3154207 are modeled in EM density map from this study. **c-d**, LY3154207 and corresponding EM density map from the previously published structures of the LY3154207-bound complex (PDB ID: 7LJD and 7CKZ). **e**, Two LY3154207



molecules are modeled in EM density map from this study. **f**, EM density for the cholesterol binding site among TM2, TM3 and TM5 from this study.

**Supplementary Table 1. Cryo-EM data collection and refinement statistics.**

EM data collection statistics

| Protein                                        | D1R-G-Nb35<br>-Fenoldopam | D1R-G-Nb35<br>-Tavapadon | D1R-G-Nb35<br>-LY3154207 |
|------------------------------------------------|---------------------------|--------------------------|--------------------------|
| EMDB                                           |                           |                          |                          |
| Microscope                                     | FEI<br>Titan Krios        | FEI Titan<br>Krios       | FEI<br>Titan Krios       |
| Voltage (kV)                                   | 300                       | 300                      | 300                      |
| Detector                                       | Gatan K3                  | Gatan K3                 | Gatan K3                 |
| Magnification<br>(nominal)                     | 64000                     | 64000                    | 64000                    |
| Pixel size<br>(Å/pix)                          | 1.087                     | 1.087                    | 1.087                    |
| Flux<br>(e <sup>-</sup> /pix/sec)              | 22                        | 22                       | 22                       |
| Frames per<br>exposure                         | 32                        | 32                       | 32                       |
| Exposure (e <sup>-</sup> /<br>Å <sup>2</sup> ) | 50                        | 50                       | 50                       |
| Defocus<br>range (µm)                          | 0.8-2.1                   | 0.7-2.0                  | 0.6-2.2                  |
| Micrographs<br>collected                       | 1035                      | 1861                     | 824                      |
| Particles<br>extracted/final                   | 124,932                   | 399,390                  | 234,629                  |
| Map<br>sharpening<br>B-factor                  | -161.4                    | -195.8                   | -153.2                   |
| Unmasked<br>resolution at<br>0.143 FSC<br>(Å)  | 3.6                       | 3.7                      | 3.5                      |
| masked<br>resolution at<br>0.143 FSC<br>(Å)    | 3.2                       | 3.3                      | 3.0                      |

Model refinement and statistics

|                      | D1R-G-Nb35<br>-Fenodolpam | D1R-G-Nb35<br>-Tavapadon | D1R-G-Nb35<br>-LY3154207 |
|----------------------|---------------------------|--------------------------|--------------------------|
| PDB                  |                           |                          |                          |
| Composition          |                           |                          |                          |
| Amino acids          | 1036                      | 1032                     | 1036                     |
| Ligand               | 3                         | 2                        | 4                        |
| RMSD bonds (Å)       | 0.004                     | 0.004                    | 0.004                    |
| RMSD angles (°)      | 0.707                     | 0.797                    | 0.776                    |
| Mean B-factors       |                           |                          |                          |
| Amino acids          | 104.51                    | 60.94                    | 101.16                   |
| ligand               | 65.18                     | 56.11                    | 78.93                    |
| Ramachandran         |                           |                          |                          |
| Favored (%)          | 97.84                     | 97.24                    | 96.76                    |
| Allowed (%)          | 2.16                      | 2.76                     | 3.24                     |
| Outliers (%)         | 0                         | 0                        | 0                        |
| Rotamer Outliers (%) | 0.57                      | 0.34                     | 0                        |
| Clash score          | 13.18                     | 13.94                    | 16.18                    |
| C-beta outliers (%)  | 0                         | 0                        | 0                        |
| CC (mask)            | 0.73                      | 0.79                     | 0.73                     |
| MolProbity score     | 1.67                      | 1.79                     | 1.91                     |
| EMRinger score       | 1.80                      | 2.37                     | 2.55                     |
